# Supplementary material for: Colonization with Carbapenem-Resistant Enterobacteriaceae Contributes to Unfavorable Outcomes in End-Stage Liver Disease Patients
Source: MDPI journal article supplement (doi:10.3390/antibiotics11111667), 2022-11-20
Supplement: s1 [file s1]

**Table S1.** Primers of carbapenem resistance, multilocus sequence type, capsular serotype related genes and virulence factors in this study.

| Primers  | Sequence (5'>3')                            | Fragment size (bp) |
|----------|---------------------------------------------|--------------------|
| IMP-F    | GGAATAGAGTGGCTTAAYTCTC                      | 232                |
| IMP-R    | GGTTTAAYAAAACAACCACC                        |                    |
| SPM-F    | AAAATCTGGGTACGCAAACG                        | 271                |
| SPM-R    | ACATTATCCGCTGGAACAGG                        |                    |
| VIM-F    | GATGGTGTGTTGGTCGCATA                        | 390                |
| VIM-R    | CGAATGCGCAGCACCAG                           |                    |
| BIC-F    | TATGCAGCTCCTTTAAGGGC                        | 537                |
| BIC-R    | TCATTGGCGGTGCCGTACAC                        |                    |
| NDM-F    | GGTTTGCGCATCTGGTTTTC                        | 621                |
| NDM-R    | CGGAATGGCTCATCACGATC                        |                    |
| KPC-F    | ATGTCACTGTATCGCCGT                          | 846                |
| KPC-R    | GGTGGTGGGCCAATAGAT                          |                    |
| AIM-F    | CTGAAGGTGTACGGAAACAC                        | 322                |
| AIM-R    | GTTCGGCCACCTCGAATTG                         |                    |
| GIM-F    | TCGACACACCTTGGTCTGAA                        | 477                |
| GIM-R    | AACTTCCAACCTTGCCATGC                        |                    |
| SIM-F    | TACAAGGGATTCTGGCATCG                        | 570                |
| SIM-R    | TAATGGCCTGTTCCCATGTG                        |                    |
| DIM-F    | GCTTGCTCTCGCTTGCTAACG                       | 699                |
| DIM-R    | CGTTCGGCTGGATTGATTG                         |                    |
| OXA-48-F | GCGTGGTTAAGGATGAACAC                        | 438                |
| OXA-48-R | CATCAAGTTCAACCCAACCG                        |                    |
| mdh-F    | CCCAACTCGCTTCAGGTTTCAG                      | 800                |
| mdh-R    | CCGTTTTTCCCCAGCAGCAG                        |                    |
| infB-F   | CTCGCTGCTGGACTATATTCG                       | 506                |
| infB-R   | CGCTTTCAGCTCAAGAACTTC                       |                    |
| pgi-F    | GAGAAAAACCTGCCTGTACTGCTGGC                  | 610                |
| pgi-R    | CGCGCCACGCTTTATAGCGGTAAAT                   |                    |
| gapA-F   | TGAAATATGACTCCACTCACGG                      | 706                |
| gapA-R   | CTTCAGAAGCGGCTTTGATGGCTT                    |                    |
| rpoB-F   | GGCGAAATGGCWGAGAACCA                        | 1119               |
| rpoB-R   | GAGTCTTCGAAGTTGTAACC                        |                    |
| phoE-F   | ACCTACCGCAACACCGACTTCTTCGG                  | 646                |
| phoE-R   | TGATCAGAAGTGGTAGGTGAT                       |                    |
| tonB-F   | CTTTATACCTCGGTACATCAGGTT                    | 583                |
| tonB-R   | ATTCGCCGGCTGRGCRGAGAG                       |                    |
| wzi-F    | GTGCCGCGAGCGCTTTCTATCTTGGTATTCC             | 580                |
| wzi-R    | GAGAGCCACTGGTTCCAGAA[C or T]TT[C or G]ACCGC |                    |
| rmpA-F   | ACGACTTTCAAGAGAAATGA                        | 516                |

|        |                          |     |
|--------|--------------------------|-----|
| rmpA-R | CATAGATGTCATAATCACAC     |     |
| iutA-F | ACCTGGGTTATCGAAAACGC     | 956 |
| iutA-R | GATGTCATAGCCTGATTGC      |     |
| iucA-F | ATAAGGCAGGCAATCCAG       | 940 |
| iucA-R | CGCTTCACTTCTTTCACTGACAGG |     |
| iroN-F | AAGTCAAAGCAGGGGTTGCCCCG  | 655 |
| iroN-R | GACGCCGACATTAAGACGCAG    |     |

---
